# Supplementary material for: Exploring the causal relationship between inflammatory bowel disease and sarcopenia-related traits: a two-sample mendelian randomization analysis
Source: publisher site journal article supplement (doi:10.18632/aging.205421), 2023-12-31
Supplement: Supplementary file [file aging-v16i1-205421-supplementary-material-SD1.pdf]

## SUPPLEMENTARY FIGURES

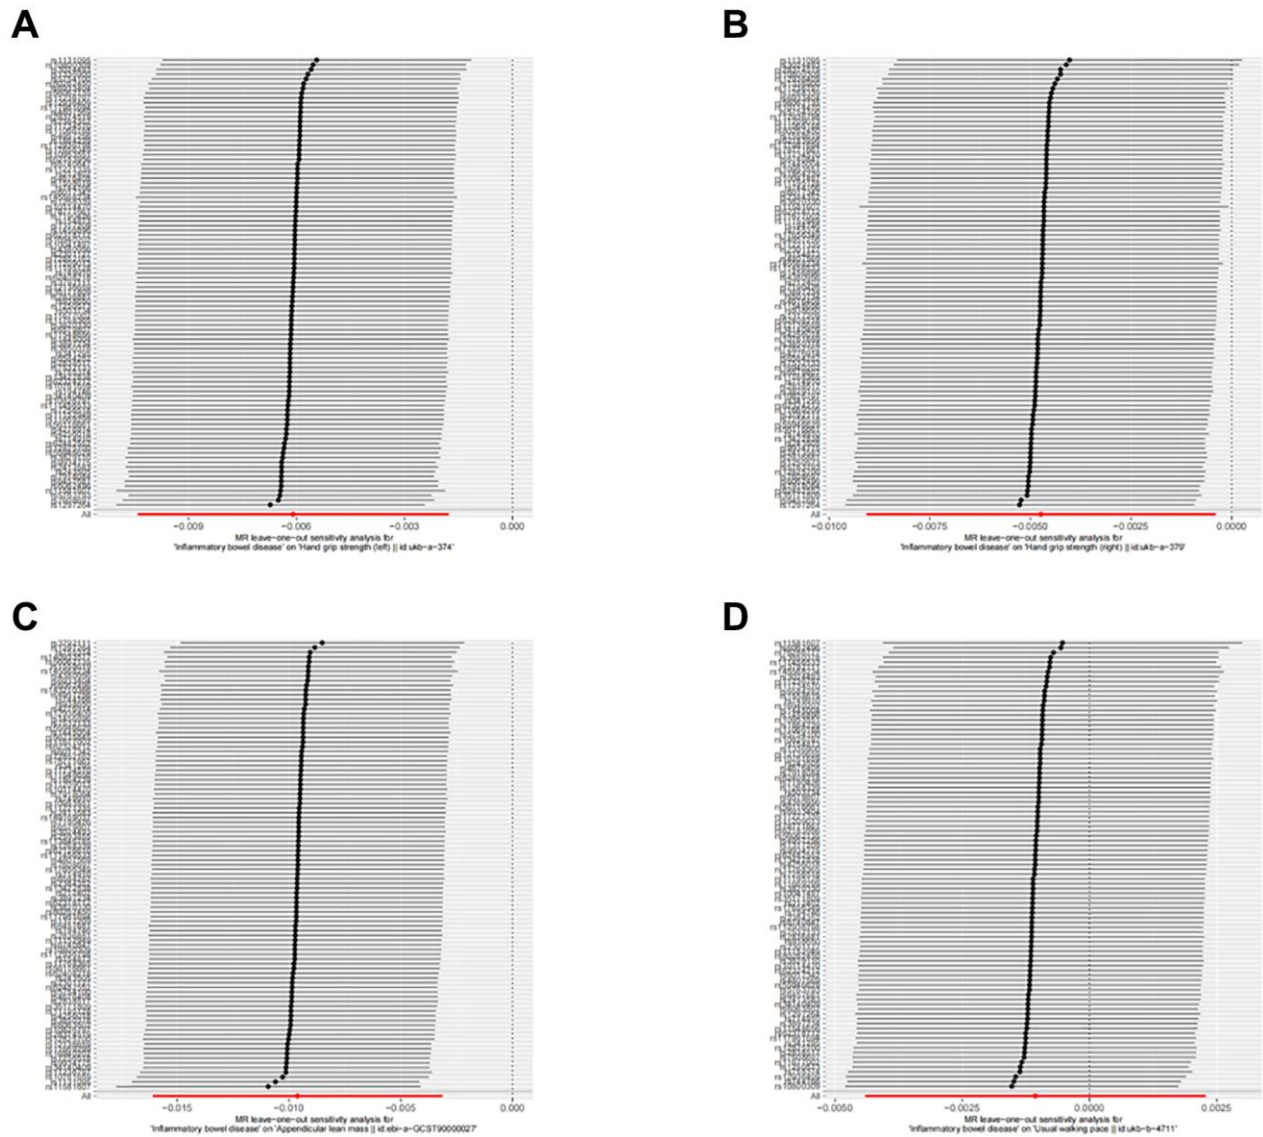

**Supplementary Figure 1. Leave-one-out analysis in the MR analyses of the causal effect of IBD on sarcopenia. (A) IBD-grip strength (left). (B) IBD-grip strength (right). (C) IBD-ALM. (D) IBD-Walking pace.**

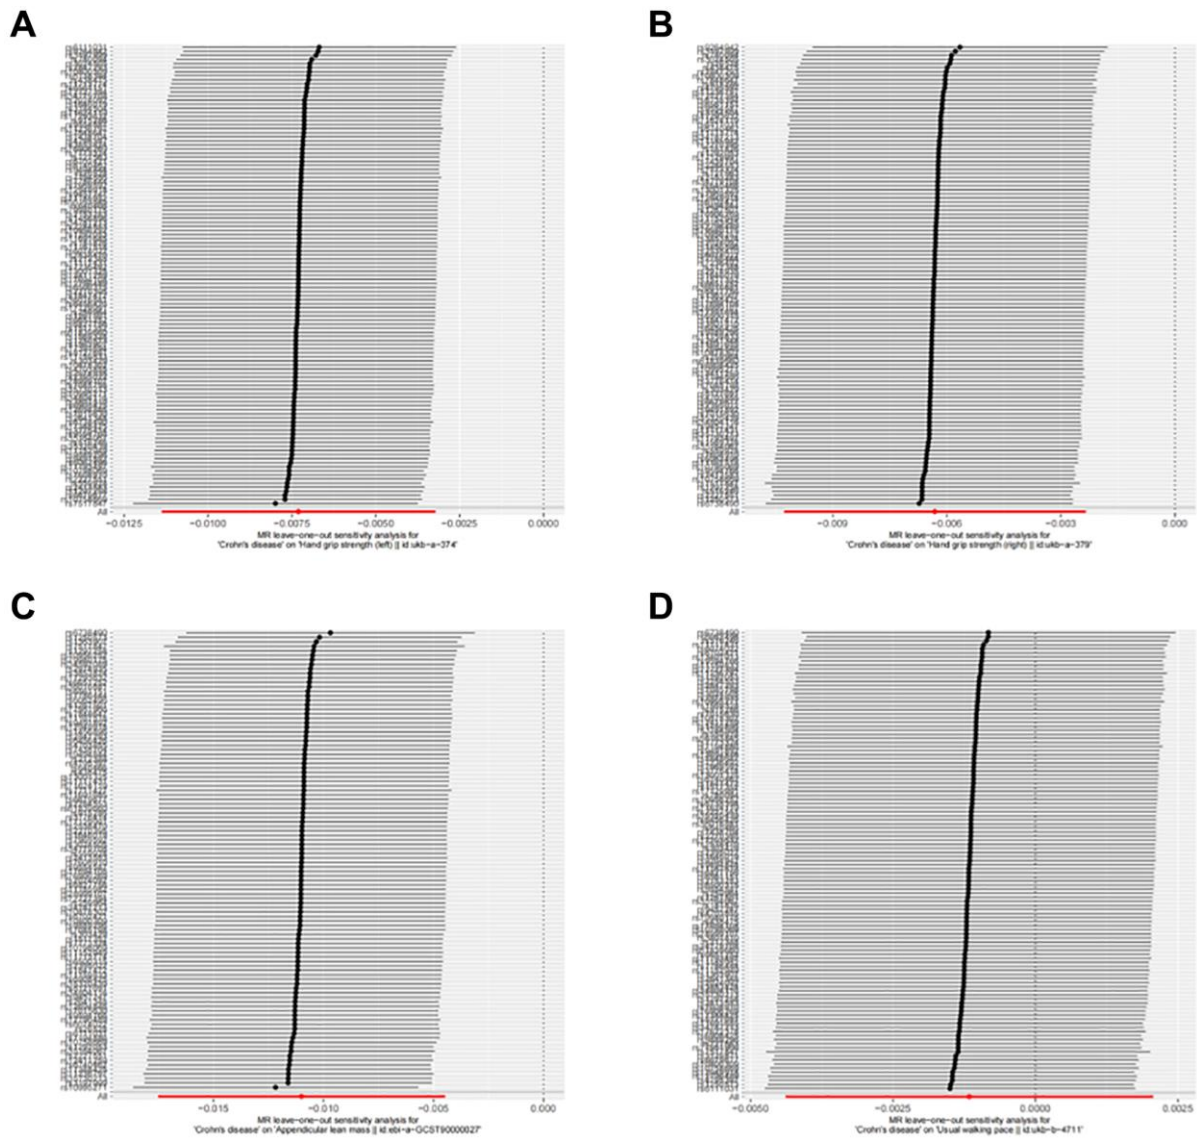

**Supplementary Figure 2. Leave-one-out analysis in the MR analyses of the causal effect of CD on sarcopenia. (A) CD-grip strength (left). (B) CD-grip strength (right). (C) CD-ALM. (D) CD-Walking pace.**

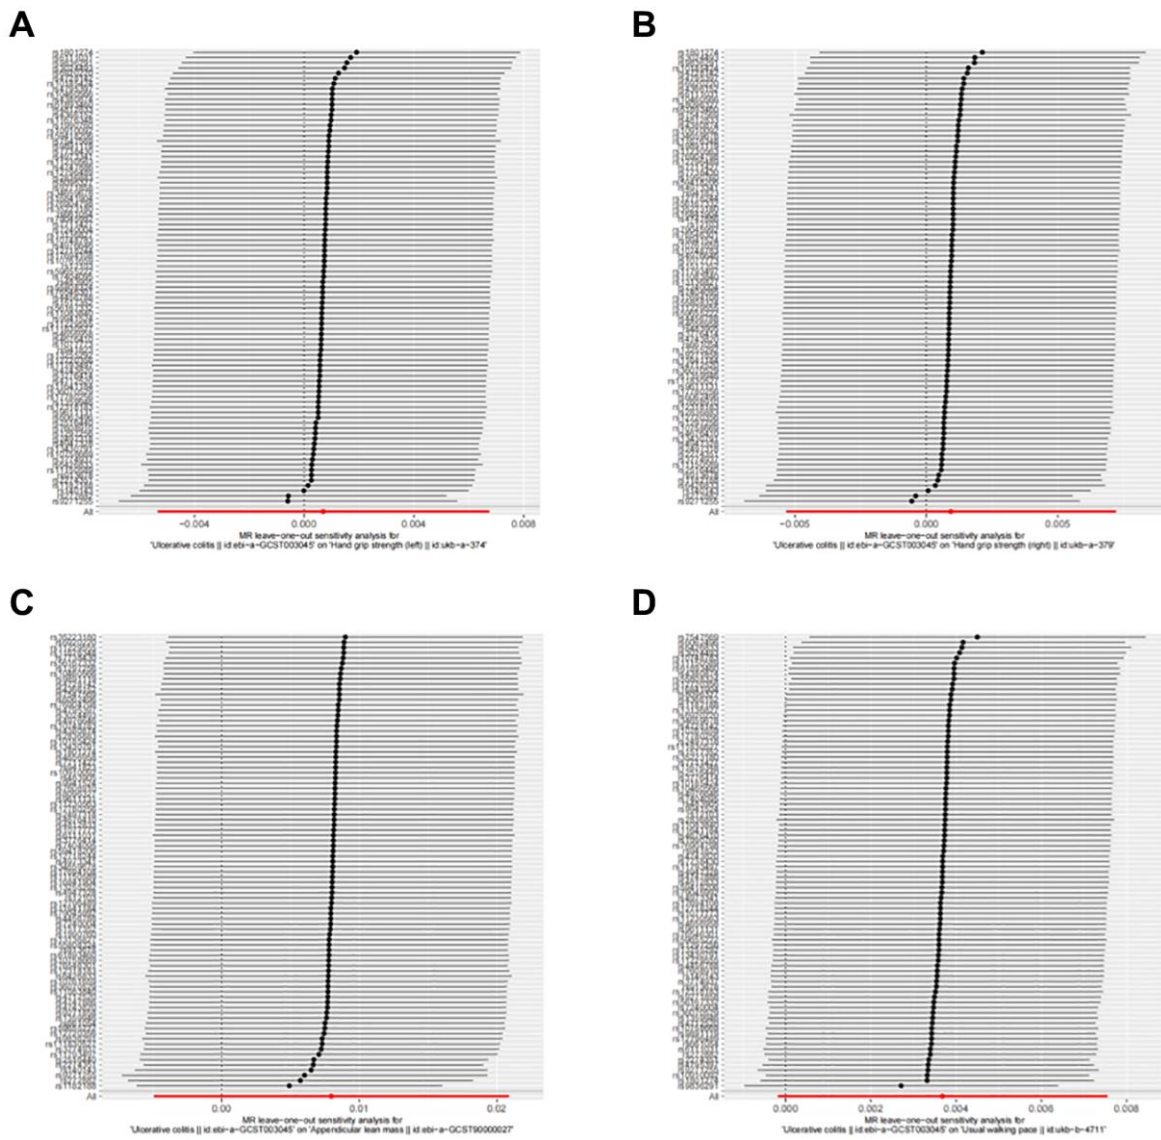

**Supplementary Figure 3. Leave-one-out analysis in the MR analyses of the causal effect of UC on sarcopenia. (A) UC-grip strength (left). (B) UC-grip strength (right). (C) UC-ALM. (D) UC-Walking pace.**

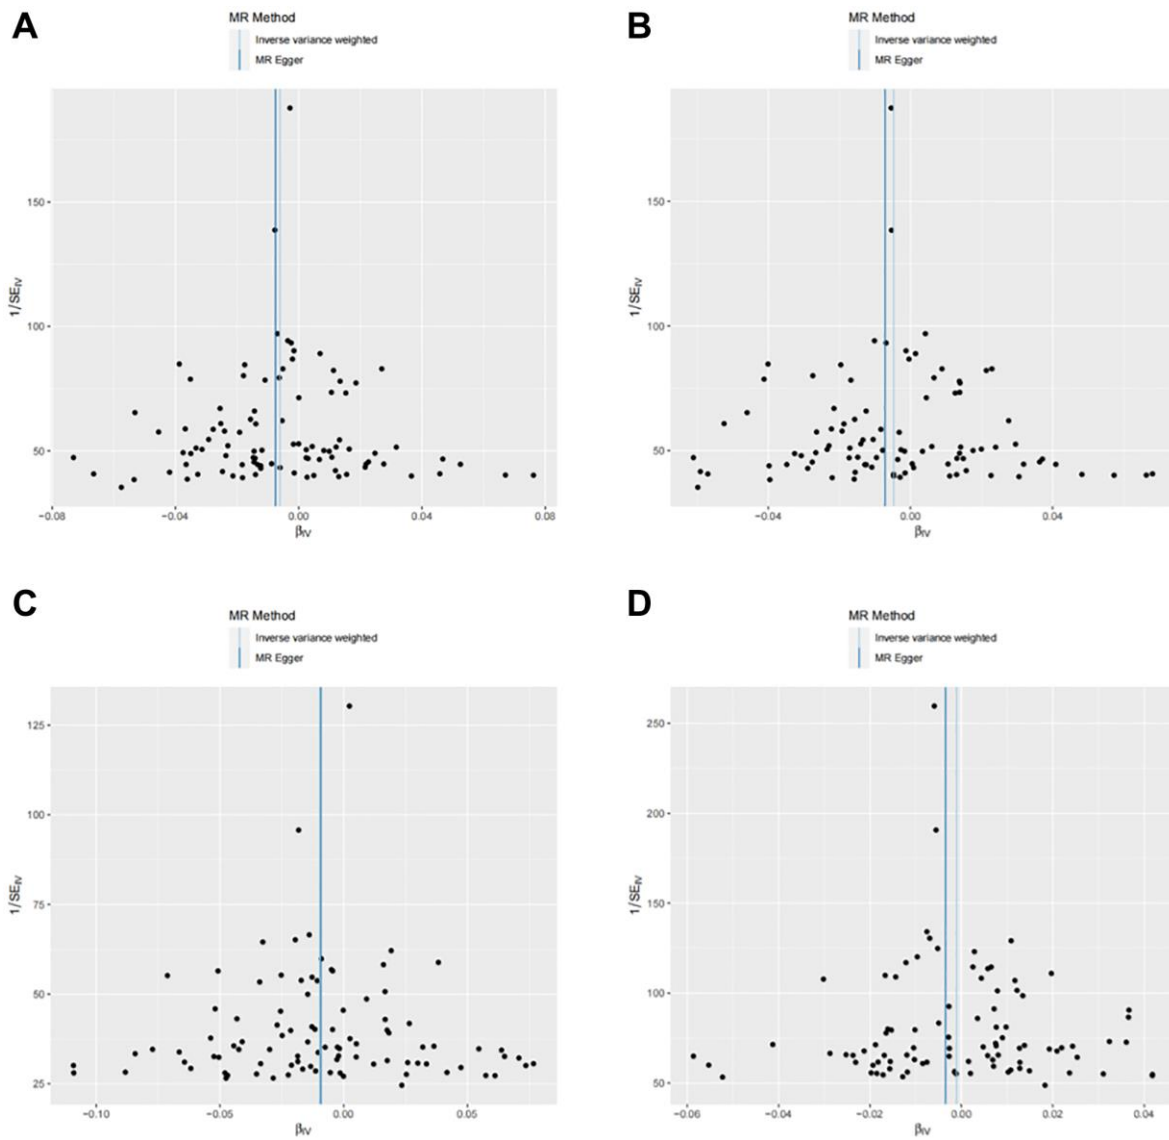

**Supplementary Figure 4. Funnel plot for MR analyses of the causal effect of IBD on sarcopenia.** (A) IBD-grip strength (left). (B) IBD-grip strength (right). (C) IBD-ALM. (D) IBD-Walking pace.

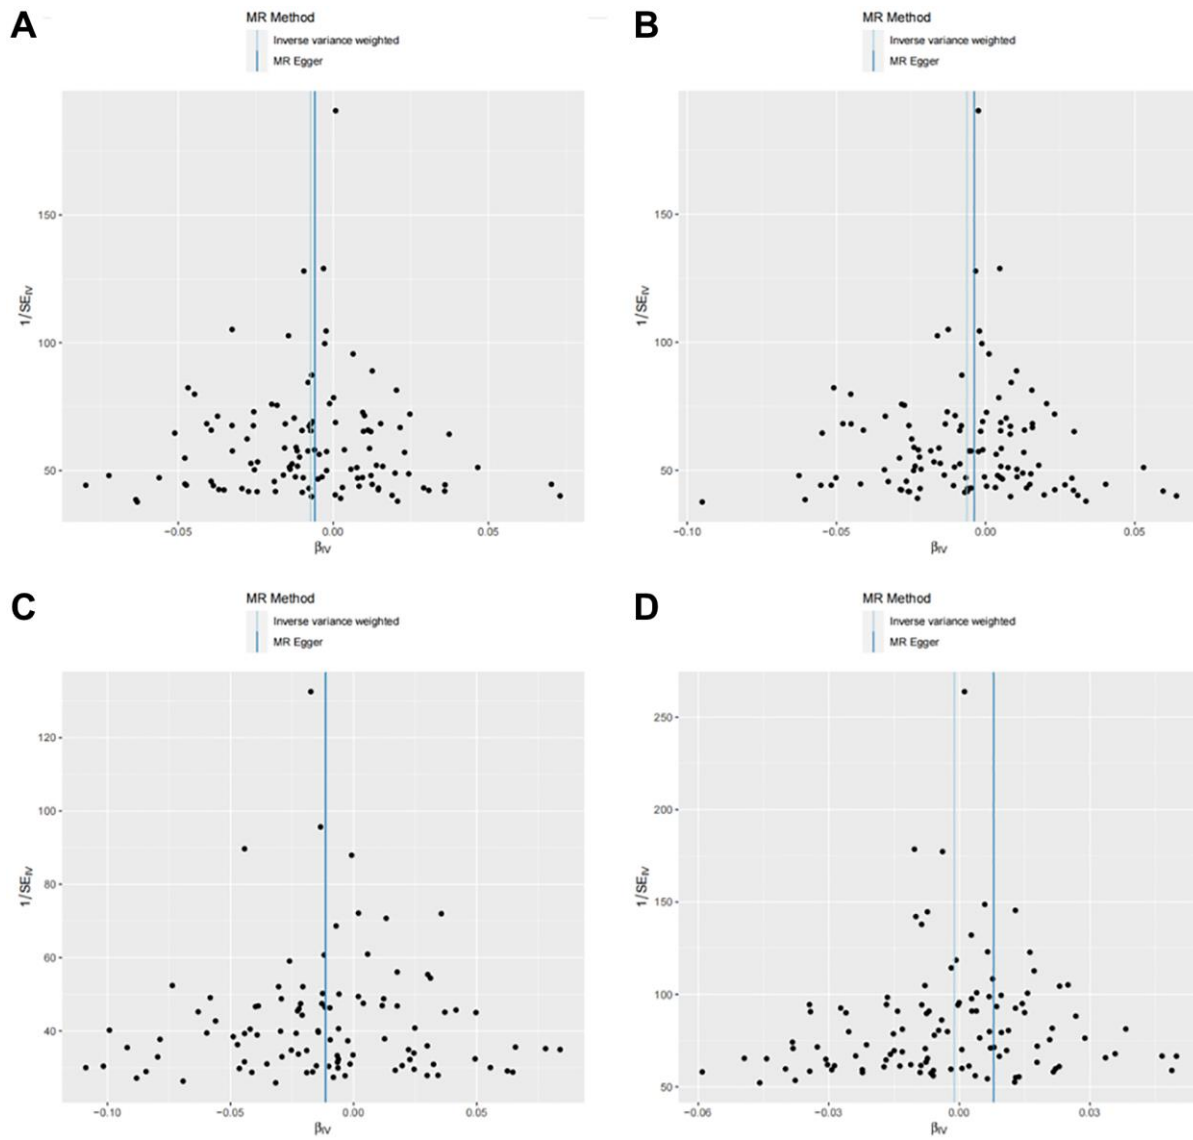

**Supplementary Figure 5. Funnel plot for MR analyses of the causal effect of CD on sarcopenia. (A) CD-grip strength (left). (B) CD-grip strength (right). (C) CD-ALM. (D) CD-Walking pace.**

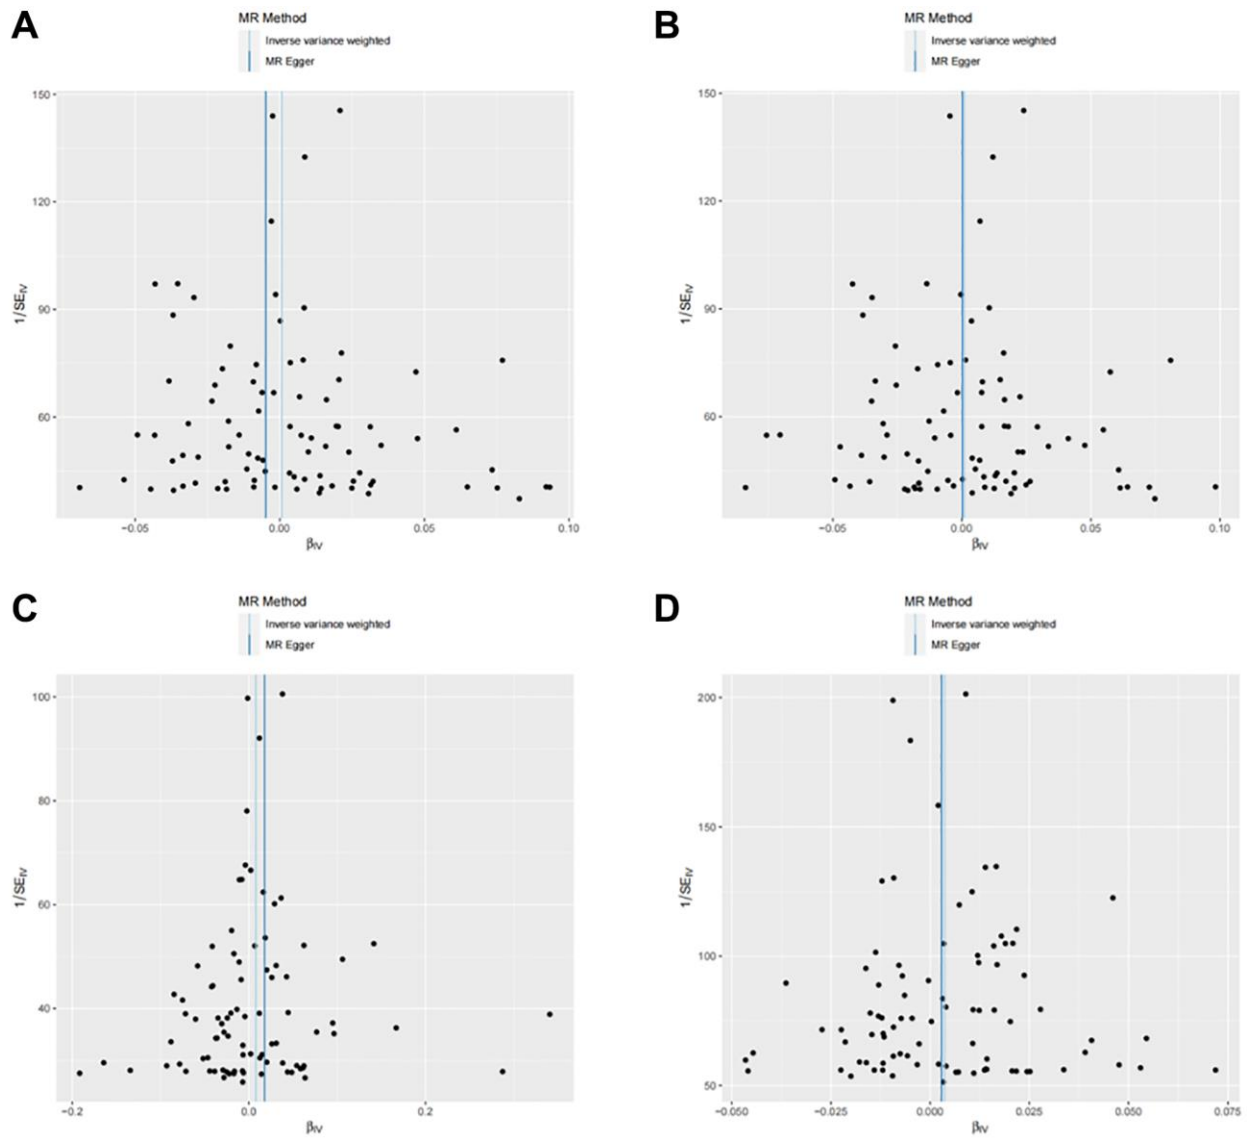

**Supplementary Figure 6. Funnel plot for MR analyses of the causal effect of UC on sarcopenia.** (A) UC-grip strength (left). (B) UC-grip strength (right). (C) UC-ALM. (D) UC-Walking pace.
