# Supplementary material for: Exploring the causal relationship between inflammatory bowel disease and sarcopenia-related traits: a two-sample Mendelian randomization analysis
Source: Aging (Albany NY). 2023 Dec 31;16(1):799–819. doi: 10.18632/aging.205421 (PMC10817405; doi:10.18632/aging.205421)
Supplement: Supplementary Table 1 [file aging-16-205421-s002.xlsx]

## Sheet: Sheet1
Supplementary Table 1. The detailed information on the IVs for IBD.
se.exposure	chr.exposure	pval.exposure	beta.exposure	samplesize.exposure	pos.exposure	id.exposure	SNP	effect_allele.exposure	other_allele.exposure	eaf.exposure	exposure	mr_keep.exposure	pval_origin.exposure	data_source.exposure
0.0142	1	1.02e-09	0.087	59957	172844250	ebi-a-GCST004131	rs12136659	C	T	NA	Inflammatory bowel disease || id:ebi-a-GCST004131	TRUE	reported	igd
0.0149	1	3.63413e-11	0.0985	59957	197701376	ebi-a-GCST004131	rs2488398	C	G	NA	Inflammatory bowel disease || id:ebi-a-GCST004131	TRUE	reported	igd
0.0164	1	1.57616e-15	0.1308	59957	8168261	ebi-a-GCST004131	rs10746475	A	T	NA	Inflammatory bowel disease || id:ebi-a-GCST004131	TRUE	reported	igd
0.0124	1	4.79954e-21	-0.1172	59957	20227723	ebi-a-GCST004131	rs4654925	C	G	NA	Inflammatory bowel disease || id:ebi-a-GCST004131	TRUE	reported	igd
0.0332	1	2.88902e-08	-0.1844	59957	39802381	ebi-a-GCST004131	rs112936798	C	A	NA	Inflammatory bowel disease || id:ebi-a-GCST004131	TRUE	reported	igd
0.014	1	7.50067e-22	-0.1346	59957	200874229	ebi-a-GCST004131	rs35730213	C	G	NA	Inflammatory bowel disease || id:ebi-a-GCST004131	TRUE	reported	igd
0.0165	1	4.0411e-31	0.1911	59957	206943968	ebi-a-GCST004131	rs3024493	A	C	NA	Inflammatory bowel disease || id:ebi-a-GCST004131	TRUE	reported	igd
0.0124	1	4.45995e-10	0.0773	59957	67656286	ebi-a-GCST004131	rs11209013	G	A	NA	Inflammatory bowel disease || id:ebi-a-GCST004131	TRUE	reported	igd
0.0294	1	4.59198e-111	-0.6578	59957	67707690	ebi-a-GCST004131	rs11581607	A	G	NA	Inflammatory bowel disease || id:ebi-a-GCST004131	TRUE	reported	igd
0.0128	1	2.98401e-11	-0.0848	59957	150679033	ebi-a-GCST004131	rs1336900	A	G	NA	Inflammatory bowel disease || id:ebi-a-GCST004131	TRUE	reported	igd
0.0133	1	1.94178e-20	-0.123	59957	161472158	ebi-a-GCST004131	rs10800309	G	A	NA	Inflammatory bowel disease || id:ebi-a-GCST004131	TRUE	reported	igd
0.0163	1	2.75201e-08	0.0907	59957	1215424	ebi-a-GCST004131	rs1268339	C	T	NA	Inflammatory bowel disease || id:ebi-a-GCST004131	TRUE	reported	igd
0.016	1	3.78617e-13	0.1164	59957	20140036	ebi-a-GCST004131	rs1317209	A	G	NA	Inflammatory bowel disease || id:ebi-a-GCST004131	TRUE	reported	igd
0.014	1	1.72199e-10	-0.0892	59957	20142413	ebi-a-GCST004131	rs3820330	A	C	NA	Inflammatory bowel disease || id:ebi-a-GCST004131	TRUE	reported	igd
0.0125	1	3.15399e-10	0.0783	59957	155142229	ebi-a-GCST004131	rs4276914	A	G	NA	Inflammatory bowel disease || id:ebi-a-GCST004131	TRUE	reported	igd
0.0134	1	3.83204e-09	0.0789	59957	160851534	ebi-a-GCST004131	rs7532133	G	A	NA	Inflammatory bowel disease || id:ebi-a-GCST004131	TRUE	reported	igd
0.0126	2	1.37088e-13	-0.0931	59957	28614401	ebi-a-GCST004131	rs11677002	C	T	NA	Inflammatory bowel disease || id:ebi-a-GCST004131	TRUE	reported	igd
0.018	2	5.45381e-13	0.1298	59957	43851246	ebi-a-GCST004131	rs55946629	A	C	NA	Inflammatory bowel disease || id:ebi-a-GCST004131	TRUE	reported	igd
0.013	2	7.62957e-15	0.1011	59957	241574401	ebi-a-GCST004131	rs4676408	A	G	NA	Inflammatory bowel disease || id:ebi-a-GCST004131	TRUE	reported	igd
0.0126	2	1.67109e-28	0.1395	59957	61204641	ebi-a-GCST004131	rs7608697	C	A	NA	Inflammatory bowel disease || id:ebi-a-GCST004131	TRUE	reported	igd
0.0205	2	2.557e-08	-0.1143	59957	187502846	ebi-a-GCST004131	rs13422838	C	T	NA	Inflammatory bowel disease || id:ebi-a-GCST004131	TRUE	reported	igd
0.0132	2	1.546e-09	-0.0797	59957	199629721	ebi-a-GCST004131	rs62180107	C	G	NA	Inflammatory bowel disease || id:ebi-a-GCST004131	TRUE	reported	igd
0.0124	2	5.12153e-29	0.1391	59957	234179690	ebi-a-GCST004131	rs3792111	T	C	NA	Inflammatory bowel disease || id:ebi-a-GCST004131	TRUE	reported	igd
0.0123	2	8.89611e-12	-0.0843	59957	102931550	ebi-a-GCST004131	rs1558619	T	G	NA	Inflammatory bowel disease || id:ebi-a-GCST004131	TRUE	reported	igd
0.0151	2	4.65479e-11	0.0996	59957	25195577	ebi-a-GCST004131	rs76286777	C	T	NA	Inflammatory bowel disease || id:ebi-a-GCST004131	TRUE	reported	igd
0.0202	2	2.298e-08	-0.1129	59957	145486323	ebi-a-GCST004131	rs72852162	C	A	NA	Inflammatory bowel disease || id:ebi-a-GCST004131	TRUE	reported	igd
0.0125	2	1.21787e-13	-0.0924	59957	182308352	ebi-a-GCST004131	rs6740847	G	A	NA	Inflammatory bowel disease || id:ebi-a-GCST004131	TRUE	reported	igd
0.0125	2	4.489e-10	-0.078	59957	219046122	ebi-a-GCST004131	rs62183956	T	C	NA	Inflammatory bowel disease || id:ebi-a-GCST004131	TRUE	reported	igd
0.0131	3	1.21899e-35	0.1635	59957	49714225	ebi-a-GCST004131	rs1131095	C	T	NA	Inflammatory bowel disease || id:ebi-a-GCST004131	TRUE	reported	igd
0.0163	3	9.27107e-10	-0.1	59957	188401160	ebi-a-GCST004131	rs56116661	T	C	NA	Inflammatory bowel disease || id:ebi-a-GCST004131	TRUE	reported	igd
0.0417	3	3.71604e-08	0.2293	59957	17184935	ebi-a-GCST004131	rs77272631	C	G	NA	Inflammatory bowel disease || id:ebi-a-GCST004131	TRUE	reported	igd
0.0124	3	2.67399e-08	-0.0692	59957	101023748	ebi-a-GCST004131	rs503734	G	A	NA	Inflammatory bowel disease || id:ebi-a-GCST004131	TRUE	reported	igd
0.014	3	2.54097e-09	-0.0832	59957	71175495	ebi-a-GCST004131	rs2593855	T	C	NA	Inflammatory bowel disease || id:ebi-a-GCST004131	TRUE	reported	igd
0.0127	4	4.80098e-08	0.0694	59957	38588453	ebi-a-GCST004131	rs11734570	A	G	NA	Inflammatory bowel disease || id:ebi-a-GCST004131	TRUE	reported	igd
0.0127	4	2.67424e-12	0.0886	59957	123560939	ebi-a-GCST004131	rs62324212	A	C	NA	Inflammatory bowel disease || id:ebi-a-GCST004131	TRUE	reported	igd
0.0155	5	3.36667e-14	-0.1179	59957	40207142	ebi-a-GCST004131	rs4957256	T	C	NA	Inflammatory bowel disease || id:ebi-a-GCST004131	TRUE	reported	igd
0.0125	5	5.16702e-09	0.0731	59957	149605994	ebi-a-GCST004131	rs17656349	T	C	NA	Inflammatory bowel disease || id:ebi-a-GCST004131	TRUE	reported	igd
0.0189	5	4.0059e-11	0.125	59957	150286845	ebi-a-GCST004131	rs6579807	T	C	NA	Inflammatory bowel disease || id:ebi-a-GCST004131	TRUE	reported	igd
0.0127	5	3.48418e-40	0.1689	59957	40414419	ebi-a-GCST004131	rs1445004	T	C	NA	Inflammatory bowel disease || id:ebi-a-GCST004131	TRUE	reported	igd
0.0142	5	4.226e-08	-0.0776	59957	158614045	ebi-a-GCST004131	rs62378712	C	T	NA	Inflammatory bowel disease || id:ebi-a-GCST004131	TRUE	reported	igd
0.0128	5	6.14752e-13	-0.0919	59957	96247810	ebi-a-GCST004131	rs6873866	C	T	NA	Inflammatory bowel disease || id:ebi-a-GCST004131	TRUE	reported	igd
0.0129	5	1.94599e-10	0.0819	59957	141514582	ebi-a-GCST004131	rs10041497	C	T	NA	Inflammatory bowel disease || id:ebi-a-GCST004131	TRUE	reported	igd
0.0134	5	1.58599e-39	0.1767	59957	158829294	ebi-a-GCST004131	rs755374	T	C	NA	Inflammatory bowel disease || id:ebi-a-GCST004131	TRUE	reported	igd
0.0138	5	1.77101e-10	0.0877	59957	176798040	ebi-a-GCST004131	rs56235845	G	T	NA	Inflammatory bowel disease || id:ebi-a-GCST004131	TRUE	reported	igd
0.0125	5	1.10002e-27	0.1366	59957	131733397	ebi-a-GCST004131	rs11739135	C	G	NA	Inflammatory bowel disease || id:ebi-a-GCST004131	TRUE	reported	igd
0.0124	5	1.45101e-08	0.0702	59957	111848890	ebi-a-GCST004131	rs341295	T	C	NA	Inflammatory bowel disease || id:ebi-a-GCST004131	TRUE	reported	igd
0.0133	6	1.56315e-14	0.1019	59957	106449085	ebi-a-GCST004131	rs11152949	G	A	NA	Inflammatory bowel disease || id:ebi-a-GCST004131	TRUE	reported	igd
0.0159	6	3.38766e-11	0.1053	59957	14716017	ebi-a-GCST004131	rs1267496	C	G	NA	Inflammatory bowel disease || id:ebi-a-GCST004131	TRUE	reported	igd
0.0476	6	4.73042e-73	0.86	59957	32247045	ebi-a-GCST004131	rs145568234	G	T	NA	Inflammatory bowel disease || id:ebi-a-GCST004131	TRUE	reported	igd
0.0153	6	3.74973e-28	-0.1687	59957	32773497	ebi-a-GCST004131	rs6457681	T	G	NA	Inflammatory bowel disease || id:ebi-a-GCST004131	TRUE	reported	igd
0.0152	6	7.13839e-12	0.1043	59957	20678430	ebi-a-GCST004131	rs4712528	C	G	NA	Inflammatory bowel disease || id:ebi-a-GCST004131	TRUE	reported	igd
0.036	6	3.13906e-15	0.2836	59957	31492353	ebi-a-GCST004131	rs143210366	G	T	NA	Inflammatory bowel disease || id:ebi-a-GCST004131	TRUE	reported	igd
0.0129	6	2.40198e-10	-0.0818	59957	90931858	ebi-a-GCST004131	rs62408218	T	C	NA	Inflammatory bowel disease || id:ebi-a-GCST004131	TRUE	reported	igd
0.013	6	1.05901e-08	-0.0743	59957	159472295	ebi-a-GCST004131	rs212402	A	G	NA	Inflammatory bowel disease || id:ebi-a-GCST004131	TRUE	reported	igd
0.0237	6	2.28402e-11	-0.1583	59957	31923654	ebi-a-GCST004131	rs34140409	T	C	NA	Inflammatory bowel disease || id:ebi-a-GCST004131	TRUE	reported	igd
0.0149	6	6.64095e-09	0.0863	59957	137959235	ebi-a-GCST004131	rs6933404	C	T	NA	Inflammatory bowel disease || id:ebi-a-GCST004131	TRUE	reported	igd
0.0123	6	1.15611e-18	0.1088	59957	167432766	ebi-a-GCST004131	rs35171809	G	A	NA	Inflammatory bowel disease || id:ebi-a-GCST004131	TRUE	reported	igd
0.0127	7	4.94311e-16	-0.1033	59957	107480901	ebi-a-GCST004131	rs10953551	G	A	NA	Inflammatory bowel disease || id:ebi-a-GCST004131	TRUE	reported	igd
0.0128	7	3.03802e-10	-0.0805	59957	148435339	ebi-a-GCST004131	rs243505	G	A	NA	Inflammatory bowel disease || id:ebi-a-GCST004131	TRUE	reported	igd
0.0242	7	3.26099e-08	-0.1338	59957	20577298	ebi-a-GCST004131	rs149169037	A	G	NA	Inflammatory bowel disease || id:ebi-a-GCST004131	TRUE	reported	igd
0.0133	7	4.50402e-11	0.0879	59957	50304461	ebi-a-GCST004131	rs1456896	T	C	NA	Inflammatory bowel disease || id:ebi-a-GCST004131	TRUE	reported	igd
0.0131	7	1.97102e-08	-0.0737	59957	100522355	ebi-a-GCST004131	rs62482552	A	G	NA	Inflammatory bowel disease || id:ebi-a-GCST004131	TRUE	reported	igd
0.0152	7	3.879e-08	-0.0837	59957	6545188	ebi-a-GCST004131	rs11768365	G	A	NA	Inflammatory bowel disease || id:ebi-a-GCST004131	TRUE	reported	igd
0.0669	8	8.94891e-09	-0.3848	59957	21986850	ebi-a-GCST004131	rs78771661	T	C	NA	Inflammatory bowel disease || id:ebi-a-GCST004131	TRUE	reported	igd
0.0127	8	1.11995e-12	0.0907	59957	126529074	ebi-a-GCST004131	rs4380956	A	G	NA	Inflammatory bowel disease || id:ebi-a-GCST004131	TRUE	reported	igd
0.0189	8	1.41299e-08	-0.1074	59957	129552540	ebi-a-GCST004131	rs938650	A	G	NA	Inflammatory bowel disease || id:ebi-a-GCST004131	TRUE	reported	igd
0.0131	9	2.46093e-36	-0.1643	59957	4984530	ebi-a-GCST004131	rs1887428	C	G	NA	Inflammatory bowel disease || id:ebi-a-GCST004131	TRUE	reported	igd
0.0137	9	4.09826e-27	0.1475	59957	117547772	ebi-a-GCST004131	rs10114470	C	T	NA	Inflammatory bowel disease || id:ebi-a-GCST004131	TRUE	reported	igd
0.0125	9	3.51965e-36	0.1574	59957	139269198	ebi-a-GCST004131	rs3829110	G	A	NA	Inflammatory bowel disease || id:ebi-a-GCST004131	TRUE	reported	igd
0.0138	10	1.10688e-12	-0.098	59957	81042475	ebi-a-GCST004131	rs1250573	A	G	NA	Inflammatory bowel disease || id:ebi-a-GCST004131	TRUE	reported	igd
0.0136	10	3.98566e-13	-0.099	59957	30690376	ebi-a-GCST004131	rs10826797	T	G	NA	Inflammatory bowel disease || id:ebi-a-GCST004131	TRUE	reported	igd
0.0124	10	1.19399e-34	-0.152	59957	101286495	ebi-a-GCST004131	rs6584282	G	A	NA	Inflammatory bowel disease || id:ebi-a-GCST004131	TRUE	reported	igd
0.0133	10	2.74397e-09	0.0792	59957	112186148	ebi-a-GCST004131	rs11195128	T	C	NA	Inflammatory bowel disease || id:ebi-a-GCST004131	TRUE	reported	igd
0.0131	10	3.11817e-13	0.0951	59957	35492832	ebi-a-GCST004131	rs2384352	G	A	NA	Inflammatory bowel disease || id:ebi-a-GCST004131	TRUE	reported	igd
0.0126	10	2.29826e-36	0.1585	59957	64445564	ebi-a-GCST004131	rs10761659	G	A	NA	Inflammatory bowel disease || id:ebi-a-GCST004131	TRUE	reported	igd
0.0125	10	1.38299e-08	0.071	59957	94429467	ebi-a-GCST004131	rs7918084	T	C	NA	Inflammatory bowel disease || id:ebi-a-GCST004131	TRUE	reported	igd
0.017	10	1.17899e-09	-0.1031	59957	126439381	ebi-a-GCST004131	rs111456533	A	G	NA	Inflammatory bowel disease || id:ebi-a-GCST004131	TRUE	reported	igd
0.0148	11	2.44e-08	0.0827	59957	128385906	ebi-a-GCST004131	rs11221335	C	T	NA	Inflammatory bowel disease || id:ebi-a-GCST004131	TRUE	reported	igd
0.0125	11	7.18787e-33	0.1488	59957	76299649	ebi-a-GCST004131	rs11236797	A	C	NA	Inflammatory bowel disease || id:ebi-a-GCST004131	TRUE	reported	igd
0.013	12	1.75914e-11	0.0874	59957	112610714	ebi-a-GCST004131	rs11066188	A	G	NA	Inflammatory bowel disease || id:ebi-a-GCST004131	TRUE	reported	igd
0.0411	12	4.53211e-17	0.3452	59957	40822098	ebi-a-GCST004131	rs117981694	A	G	NA	Inflammatory bowel disease || id:ebi-a-GCST004131	TRUE	reported	igd
0.0127	12	1.27497e-25	0.1324	59957	68492980	ebi-a-GCST004131	rs12825700	A	G	NA	Inflammatory bowel disease || id:ebi-a-GCST004131	TRUE	reported	igd
0.0145	13	1.89889e-11	0.0971	59957	27542030	ebi-a-GCST004131	rs3897234	C	T	NA	Inflammatory bowel disease || id:ebi-a-GCST004131	TRUE	reported	igd
0.0305	13	1.13e-09	-0.1857	59957	40836270	ebi-a-GCST004131	rs140933577	C	T	NA	Inflammatory bowel disease || id:ebi-a-GCST004131	TRUE	reported	igd
0.0124	14	1.83612e-11	0.0833	59957	69282887	ebi-a-GCST004131	rs194746	T	C	NA	Inflammatory bowel disease || id:ebi-a-GCST004131	TRUE	reported	igd
0.0207	14	1.10002e-13	0.1536	59957	88417517	ebi-a-GCST004131	rs3850378	C	T	NA	Inflammatory bowel disease || id:ebi-a-GCST004131	TRUE	reported	igd
0.1782	15	6.27047e-14	1.3366	59957	80205354	ebi-a-GCST004131	rs1864239	G	A	NA	Inflammatory bowel disease || id:ebi-a-GCST004131	TRUE	reported	igd
0.0145	15	1.37088e-21	0.1382	59957	67455630	ebi-a-GCST004131	rs56062135	T	C	NA	Inflammatory bowel disease || id:ebi-a-GCST004131	TRUE	reported	igd
0.0155	16	2.05698e-08	-0.0872	59957	23855853	ebi-a-GCST004131	rs7190426	C	A	NA	Inflammatory bowel disease || id:ebi-a-GCST004131	TRUE	reported	igd
0.0137	16	6.54636e-16	-0.1105	59957	28489342	ebi-a-GCST004131	rs28374519	A	G	NA	Inflammatory bowel disease || id:ebi-a-GCST004131	TRUE	reported	igd
0.0172	16	8.76799e-11	-0.1116	59957	50383077	ebi-a-GCST004131	rs9934775	T	C	NA	Inflammatory bowel disease || id:ebi-a-GCST004131	TRUE	reported	igd
0.0327	16	2.99089e-17	0.2765	59957	50885211	ebi-a-GCST004131	rs8056255	A	T	NA	Inflammatory bowel disease || id:ebi-a-GCST004131	TRUE	reported	igd
0.0362	16	5.18442e-11	-0.2374	59957	81916912	ebi-a-GCST004131	rs11548656	G	A	NA	Inflammatory bowel disease || id:ebi-a-GCST004131	TRUE	reported	igd
0.0138	16	7.82889e-46	0.1961	59957	50758849	ebi-a-GCST004131	rs749910	A	G	NA	Inflammatory bowel disease || id:ebi-a-GCST004131	TRUE	reported	igd
0.0126	16	4.96101e-10	0.0783	59957	11367477	ebi-a-GCST004131	rs2301127	A	G	NA	Inflammatory bowel disease || id:ebi-a-GCST004131	TRUE	reported	igd
0.0169	16	2.50496e-11	0.113	59957	86014241	ebi-a-GCST004131	rs16940202	C	T	NA	Inflammatory bowel disease || id:ebi-a-GCST004131	TRUE	reported	igd
0.0124	17	7.72681e-30	0.1406	59957	38043649	ebi-a-GCST004131	rs12936409	T	C	NA	Inflammatory bowel disease || id:ebi-a-GCST004131	TRUE	reported	igd
0.0126	17	1.33999e-18	-0.1109	59957	40514201	ebi-a-GCST004131	rs744166	G	A	NA	Inflammatory bowel disease || id:ebi-a-GCST004131	TRUE	reported	igd
0.0139	17	6.22874e-12	-0.0959	59957	32617265	ebi-a-GCST004131	rs714910	C	A	NA	Inflammatory bowel disease || id:ebi-a-GCST004131	TRUE	reported	igd
0.018	17	2.47286e-13	-0.1319	59957	70611194	ebi-a-GCST004131	rs113846785	CG	C	NA	Inflammatory bowel disease || id:ebi-a-GCST004131	TRUE	reported	igd
0.0147	18	7.49894e-09	-0.0851	59957	46404813	ebi-a-GCST004131	rs1319951	G	C	NA	Inflammatory bowel disease || id:ebi-a-GCST004131	TRUE	reported	igd
0.019	18	1.04112e-16	0.1581	59957	12818922	ebi-a-GCST004131	rs80262450	A	G	NA	Inflammatory bowel disease || id:ebi-a-GCST004131	TRUE	reported	igd
0.0152	19	4.23936e-17	0.1281	59957	1123378	ebi-a-GCST004131	rs4807569	C	A	NA	Inflammatory bowel disease || id:ebi-a-GCST004131	TRUE	reported	igd
0.0276	19	1.632e-09	-0.1665	59957	10626375	ebi-a-GCST004131	rs7256518	A	G	NA	Inflammatory bowel disease || id:ebi-a-GCST004131	TRUE	reported	igd
0.0166	19	2.60016e-17	0.1407	59957	33748183	ebi-a-GCST004131	rs62126610	G	A	NA	Inflammatory bowel disease || id:ebi-a-GCST004131	TRUE	reported	igd
0.0157	19	1.83612e-12	-0.1107	59957	10496621	ebi-a-GCST004131	rs11669299	T	C	NA	Inflammatory bowel disease || id:ebi-a-GCST004131	TRUE	reported	igd
0.0129	20	2.82618e-26	0.137	59957	62329099	ebi-a-GCST004131	rs6062496	A	G	NA	Inflammatory bowel disease || id:ebi-a-GCST004131	TRUE	reported	igd
0.0138	20	1.23001e-08	0.0786	59957	6093889	ebi-a-GCST004131	rs4256018	G	T	NA	Inflammatory bowel disease || id:ebi-a-GCST004131	TRUE	reported	igd
0.0135	20	1.07103e-17	0.1156	59957	43065028	ebi-a-GCST004131	rs6017342	C	A	NA	Inflammatory bowel disease || id:ebi-a-GCST004131	TRUE	reported	igd
0.0134	20	4.548e-08	-0.0734	59957	48955595	ebi-a-GCST004131	rs6063502	G	A	NA	Inflammatory bowel disease || id:ebi-a-GCST004131	TRUE	reported	igd
0.0132	20	7.377e-10	-0.0813	59957	57855032	ebi-a-GCST004131	rs154873	A	G	NA	Inflammatory bowel disease || id:ebi-a-GCST004131	TRUE	reported	igd
0.0126	21	3.98016e-31	-0.1462	59957	16816017	ebi-a-GCST004131	rs1297264	G	A	NA	Inflammatory bowel disease || id:ebi-a-GCST004131	TRUE	reported	igd
0.0146	21	1.95884e-29	-0.1643	59957	40466299	ebi-a-GCST004131	rs2836881	T	G	NA	Inflammatory bowel disease || id:ebi-a-GCST004131	TRUE	reported	igd
0.0125	21	1.83485e-24	-0.128	59957	45613825	ebi-a-GCST004131	rs2838517	C	T	NA	Inflammatory bowel disease || id:ebi-a-GCST004131	TRUE	reported	igd
0.0171	22	4.59515e-24	-0.1732	59957	39659773	ebi-a-GCST004131	rs2413583	T	C	NA	Inflammatory bowel disease || id:ebi-a-GCST004131	TRUE	reported	igd
0.016	22	7.14003e-16	0.1293	59957	21916166	ebi-a-GCST004131	rs5754100	C	T	NA	Inflammatory bowel disease || id:ebi-a-GCST004131	TRUE	reported	igd
0.013	22	1.467e-08	0.0734	59957	30526632	ebi-a-GCST004131	rs5763793	T	G	NA	Inflammatory bowel disease || id:ebi-a-GCST004131	TRUE	reported	igd
