# Supplementary material for: Exploring the causal relationship between inflammatory bowel disease and sarcopenia-related traits: a two-sample Mendelian randomization analysis
Source: Aging (Albany NY). 2023 Dec 31;16(1):799–819. doi: 10.18632/aging.205421 (PMC10817405; doi:10.18632/aging.205421)
Supplement: Supplementary Table 2 [file aging-16-205421-s003.xlsx]

## Sheet: Sheet1
Supplementary Table 2. The detailed information on the IVs for UC.
pval.exposure	pos.exposure	beta.exposure	chr.exposure	samplesize.exposure	se.exposure	id.exposure	SNP	effect_allele.exposure	other_allele.exposure	eaf.exposure	exposure	mr_keep.exposure	pval_origin.exposure	data_source.exposure
1.0392e-15	8185902	-0.141003	1	27432	0.0175766	ebi-a-GCST003045	rs35223180	T	G	0.1791	Ulcerative colitis || id:ebi-a-GCST003045	TRUE	reported	igd
3.77051e-76	20171860	0.232387	1	27432	0.0125836	ebi-a-GCST003045	rs6426833	A	G	0.536	Ulcerative colitis || id:ebi-a-GCST003045	TRUE	reported	igd
5.08745e-11	22687173	-0.192324	1	27432	0.0292804	ebi-a-GCST003045	rs111830527	A	G	0.05254	Ulcerative colitis || id:ebi-a-GCST003045	TRUE	reported	igd
8.70964e-65	67731368	-0.495701	1	27432	0.0291648	ebi-a-GCST003045	rs7547569	C	T	0.06675	Ulcerative colitis || id:ebi-a-GCST003045	TRUE	reported	igd
1.90349e-08	197701992	0.0860225	1	27432	0.015305	ebi-a-GCST003045	rs16841904	T	C	0.2028	Ulcerative colitis || id:ebi-a-GCST003045	TRUE	reported	igd
1.42266e-11	2501516	-0.0863506	1	27432	0.0127821	ebi-a-GCST003045	rs10910092	G	A	0.4676	Ulcerative colitis || id:ebi-a-GCST003045	TRUE	reported	igd
1.41971e-43	206943968	0.226278	1	27432	0.0163471	ebi-a-GCST003045	rs3024493	A	C	0.1572	Ulcerative colitis || id:ebi-a-GCST003045	TRUE	reported	igd
1.4345e-41	161479745	-0.170896	1	27432	0.012653	ebi-a-GCST003045	rs1801274	G	A	0.4958	Ulcerative colitis || id:ebi-a-GCST003045	TRUE	reported	igd
9.96369e-10	1247494	-0.0995588	1	27432	0.0162944	ebi-a-GCST003045	rs12103	C	T	0.8166	Ulcerative colitis || id:ebi-a-GCST003045	TRUE	reported	igd
2.8167e-09	160856964	0.0824158	1	27432	0.0138702	ebi-a-GCST003045	rs4656958	G	A	0.6821	Ulcerative colitis || id:ebi-a-GCST003045	TRUE	reported	igd
3.80978e-31	200875897	-0.166889	1	27432	0.0143787	ebi-a-GCST003045	rs59655222	C	T	0.2809	Ulcerative colitis || id:ebi-a-GCST003045	TRUE	reported	igd
2.09991e-09	191931464	0.0777839	2	27432	0.0129859	ebi-a-GCST003045	rs1517352	C	A	0.6048	Ulcerative colitis || id:ebi-a-GCST003045	TRUE	reported	igd
1.47367e-14	102662888	-0.0965995	2	27432	0.0125621	ebi-a-GCST003045	rs10185424	G	T	0.5396	Ulcerative colitis || id:ebi-a-GCST003045	TRUE	reported	igd
1.85481e-19	241563739	0.142022	2	27432	0.0157426	ebi-a-GCST003045	rs4676410	A	G	0.2038	Ulcerative colitis || id:ebi-a-GCST003045	TRUE	reported	igd
1.39422e-08	43481013	0.105886	2	27432	0.0186614	ebi-a-GCST003045	rs13430791	A	G	0.1202	Ulcerative colitis || id:ebi-a-GCST003045	TRUE	reported	igd
2.15278e-14	199499443	0.0977156	2	27432	0.0127881	ebi-a-GCST003045	rs9941524	G	A	0.4559	Ulcerative colitis || id:ebi-a-GCST003045	TRUE	reported	igd
1.7809e-10	163124051	-0.0855732	2	27432	0.0134145	ebi-a-GCST003045	rs1990760	T	C	0.6085	Ulcerative colitis || id:ebi-a-GCST003045	TRUE	reported	igd
2.07678e-09	219010146	0.0744362	2	27432	0.0124232	ebi-a-GCST003045	rs11676348	T	C	0.4763	Ulcerative colitis || id:ebi-a-GCST003045	TRUE	reported	igd
2.25336e-08	228660362	0.073473	2	27432	0.0131405	ebi-a-GCST003045	rs4973341	T	C	0.6627	Ulcerative colitis || id:ebi-a-GCST003045	TRUE	reported	igd
1.59643e-08	25483121	-0.0817673	2	27432	0.0144699	ebi-a-GCST003045	rs10460566	A	G	0.7611	Ulcerative colitis || id:ebi-a-GCST003045	TRUE	reported	igd
1.25026e-23	61204856	0.127099	2	27432	0.0126851	ebi-a-GCST003045	rs7608910	G	A	0.3909	Ulcerative colitis || id:ebi-a-GCST003045	TRUE	reported	igd
8.19785e-38	49697459	0.170257	3	27432	0.0132458	ebi-a-GCST003045	rs9836291	A	G	0.2878	Ulcerative colitis || id:ebi-a-GCST003045	TRUE	reported	igd
4.60787e-14	103434253	0.099276	4	27432	0.0131621	ebi-a-GCST003045	rs3774937	C	T	0.3257	Ulcerative colitis || id:ebi-a-GCST003045	TRUE	reported	igd
2.34542e-10	123171318	-0.111814	4	27432	0.0176452	ebi-a-GCST003045	rs13136827	C	T	0.1622	Ulcerative colitis || id:ebi-a-GCST003045	TRUE	reported	igd
3.67367e-12	40414886	0.088938	5	27432	0.0127983	ebi-a-GCST003045	rs7711427	C	A	0.613	Ulcerative colitis || id:ebi-a-GCST003045	TRUE	reported	igd
1.04073e-08	158619835	-0.091704	5	27432	0.0160211	ebi-a-GCST003045	rs36070529	A	G	0.1999	Ulcerative colitis || id:ebi-a-GCST003045	TRUE	reported	igd
7.2711e-27	158827769	0.141368	5	27432	0.0131737	ebi-a-GCST003045	rs56167332	A	C	0.3375	Ulcerative colitis || id:ebi-a-GCST003045	TRUE	reported	igd
2.51721e-09	176788570	0.0787748	5	27432	0.0132165	ebi-a-GCST003045	rs4976646	C	T	0.3415	Ulcerative colitis || id:ebi-a-GCST003045	TRUE	reported	igd
4.10346e-08	10689562	0.0704798	5	27432	0.0128464	ebi-a-GCST003045	rs3776414	G	T	0.3756	Ulcerative colitis || id:ebi-a-GCST003045	TRUE	reported	igd
6.66807e-26	131669161	0.145856	5	27432	0.0138588	ebi-a-GCST003045	rs272882	T	G	0.6733	Ulcerative colitis || id:ebi-a-GCST003045	TRUE	reported	igd
4.40352e-13	31440497	-0.0997745	6	27432	0.0137762	ebi-a-GCST003045	rs2516440	A	G	0.3222	Ulcerative colitis || id:ebi-a-GCST003045	TRUE	reported	igd
2.20841e-08	20640871	0.0929892	6	27432	0.0166206	ebi-a-GCST003045	rs4712520	C	T	0.8182	Ulcerative colitis || id:ebi-a-GCST003045	TRUE	reported	igd
1.31009e-94	32580357	-0.284959	6	27432	0.013809	ebi-a-GCST003045	rs9271255	T	C	0.732	Ulcerative colitis || id:ebi-a-GCST003045	TRUE	reported	igd
3.50913e-27	31508836	0.367964	6	27432	0.0340763	ebi-a-GCST003045	rs7738430	C	T	0.02624	Ulcerative colitis || id:ebi-a-GCST003045	TRUE	reported	igd
4.77969e-22	138006504	0.146936	6	27432	0.015222	ebi-a-GCST003045	rs6920220	A	G	0.2086	Ulcerative colitis || id:ebi-a-GCST003045	TRUE	reported	igd
2.41769e-21	32595223	0.122709	6	27432	0.0129368	ebi-a-GCST003045	rs9271858	G	A	0.511	Ulcerative colitis || id:ebi-a-GCST003045	TRUE	reported	igd
5.95251e-17	111888540	0.209947	6	27432	0.0250948	ebi-a-GCST003045	rs34659678	T	C	0.05734	Ulcerative colitis || id:ebi-a-GCST003045	TRUE	reported	igd
3.38314e-10	31561747	0.239455	6	27432	0.038129	ebi-a-GCST003045	rs4947328	G	A	0.02366	Ulcerative colitis || id:ebi-a-GCST003045	TRUE	reported	igd
5.03153e-15	2869985	-0.107615	7	27432	0.0137507	ebi-a-GCST003045	rs1182188	C	T	0.2989	Ulcerative colitis || id:ebi-a-GCST003045	TRUE	reported	igd
5.96458e-09	17442679	0.0721282	7	27432	0.012398	ebi-a-GCST003045	rs1077773	A	G	0.5238	Ulcerative colitis || id:ebi-a-GCST003045	TRUE	reported	igd
1.4115e-08	50175654	0.0717762	7	27432	0.0126545	ebi-a-GCST003045	rs12718244	A	G	0.4081	Ulcerative colitis || id:ebi-a-GCST003045	TRUE	reported	igd
1.91823e-14	128573967	0.0969671	7	27432	0.0126655	ebi-a-GCST003045	rs4728142	A	G	0.439	Ulcerative colitis || id:ebi-a-GCST003045	TRUE	reported	igd
1.04918e-10	50498389	0.26496	7	27432	0.0410174	ebi-a-GCST003045	rs76546301	A	G	0.01822	Ulcerative colitis || id:ebi-a-GCST003045	TRUE	reported	igd
6.4254e-25	107480315	-0.130874	7	27432	0.0126952	ebi-a-GCST003045	rs4380874	C	T	0.5907	Ulcerative colitis || id:ebi-a-GCST003045	TRUE	reported	igd
3.81514e-08	129076573	-0.075463	8	27432	0.0137225	ebi-a-GCST003045	rs13255292	T	C	0.3284	Ulcerative colitis || id:ebi-a-GCST003045	TRUE	reported	igd
7.79471e-19	117564875	0.120371	9	27432	0.0135814	ebi-a-GCST003045	rs4366152	C	T	0.68	Ulcerative colitis || id:ebi-a-GCST003045	TRUE	reported	igd
4.04772e-09	93928416	0.0809228	9	27432	0.0137572	ebi-a-GCST003045	rs4743820	T	C	0.7019	Ulcerative colitis || id:ebi-a-GCST003045	TRUE	reported	igd
1.03753e-28	4981602	-0.143218	9	27432	0.0128828	ebi-a-GCST003045	rs10758669	A	C	0.6504	Ulcerative colitis || id:ebi-a-GCST003045	TRUE	reported	igd
1.7398e-26	139271850	0.134108	9	27432	0.0125921	ebi-a-GCST003045	rs11793497	G	A	0.423	Ulcerative colitis || id:ebi-a-GCST003045	TRUE	reported	igd
9.58341e-09	6176166	0.0738479	10	27432	0.0128701	ebi-a-GCST003045	rs4747886	T	C	0.4081	Ulcerative colitis || id:ebi-a-GCST003045	TRUE	reported	igd
1.45001e-08	35331624	0.0735513	10	27432	0.012978	ebi-a-GCST003045	rs59418206	A	G	0.3508	Ulcerative colitis || id:ebi-a-GCST003045	TRUE	reported	igd
1.49796e-20	64445564	0.117315	10	27432	0.0126238	ebi-a-GCST003045	rs10761659	G	A	0.5399	Ulcerative colitis || id:ebi-a-GCST003045	TRUE	reported	igd
4.89531e-08	104264107	0.0710979	10	27432	0.0130334	ebi-a-GCST003045	rs2274351	T	C	0.5373	Ulcerative colitis || id:ebi-a-GCST003045	TRUE	reported	igd
1.14641e-08	94432000	-0.0714375	10	27432	0.0125164	ebi-a-GCST003045	rs2497318	T	C	0.4504	Ulcerative colitis || id:ebi-a-GCST003045	TRUE	reported	igd
7.73393e-39	101285872	-0.164756	10	27432	0.0126394	ebi-a-GCST003045	rs10748783	A	C	0.5237	Ulcerative colitis || id:ebi-a-GCST003045	TRUE	reported	igd
3.15929e-10	96023427	0.0849927	11	27432	0.0135107	ebi-a-GCST003045	rs483905	A	G	0.289	Ulcerative colitis || id:ebi-a-GCST003045	TRUE	reported	igd
1.21787e-33	3059360	-0.67649	11	27432	0.0559623	ebi-a-GCST003045	rs12796489	A	C	0.02286	Ulcerative colitis || id:ebi-a-GCST003045	TRUE	reported	igd
1.90296e-08	60776209	-0.0750666	11	27432	0.0133556	ebi-a-GCST003045	rs11230563	T	C	0.348	Ulcerative colitis || id:ebi-a-GCST003045	TRUE	reported	igd
1.2147e-08	58408687	-0.0823351	11	27432	0.0144507	ebi-a-GCST003045	rs11229555	T	G	0.2515	Ulcerative colitis || id:ebi-a-GCST003045	TRUE	reported	igd
4.60363e-22	76291154	0.121119	11	27432	0.0125424	ebi-a-GCST003045	rs61893460	A	G	0.4447	Ulcerative colitis || id:ebi-a-GCST003045	TRUE	reported	igd
3.18273e-20	114430410	-0.124858	11	27432	0.0135529	ebi-a-GCST003045	rs661054	G	A	0.3408	Ulcerative colitis || id:ebi-a-GCST003045	TRUE	reported	igd
2.77984e-09	40614434	0.104624	12	27432	0.0176013	ebi-a-GCST003045	rs76904798	T	C	0.1368	Ulcerative colitis || id:ebi-a-GCST003045	TRUE	reported	igd
1.44278e-37	68503836	0.162178	12	27432	0.0126604	ebi-a-GCST003045	rs12318183	A	C	0.3854	Ulcerative colitis || id:ebi-a-GCST003045	TRUE	reported	igd
9.63829e-17	27536972	0.131438	13	27432	0.0158185	ebi-a-GCST003045	rs1359946	A	G	0.1824	Ulcerative colitis || id:ebi-a-GCST003045	TRUE	reported	igd
1.39155e-13	41013977	0.108669	13	27432	0.0146906	ebi-a-GCST003045	rs941823	C	T	0.7509	Ulcerative colitis || id:ebi-a-GCST003045	TRUE	reported	igd
1.47092e-09	88444752	0.127209	14	27432	0.021035	ebi-a-GCST003045	rs55808324	A	G	0.09318	Ulcerative colitis || id:ebi-a-GCST003045	TRUE	reported	igd
4.24043e-10	11704651	0.0780232	16	27432	0.0124939	ebi-a-GCST003045	rs11641184	A	C	0.4762	Ulcerative colitis || id:ebi-a-GCST003045	TRUE	reported	igd
3.28398e-10	30482494	-0.0798521	16	27432	0.0127057	ebi-a-GCST003045	rs11150589	C	T	0.5268	Ulcerative colitis || id:ebi-a-GCST003045	TRUE	reported	igd
1.43321e-08	68518992	0.118093	16	27432	0.02083	ebi-a-GCST003045	rs79045992	A	G	0.1033	Ulcerative colitis || id:ebi-a-GCST003045	TRUE	reported	igd
1.52416e-08	23864590	0.0717686	16	27432	0.0126826	ebi-a-GCST003045	rs7404095	C	T	0.5796	Ulcerative colitis || id:ebi-a-GCST003045	TRUE	reported	igd
1.00624e-28	38023745	0.139853	17	27432	0.012577	ebi-a-GCST003045	rs4795397	G	A	0.4713	Ulcerative colitis || id:ebi-a-GCST003045	TRUE	reported	igd
1.72346e-11	40507980	-0.0895467	17	27432	0.0133101	ebi-a-GCST003045	rs9891119	C	A	0.3536	Ulcerative colitis || id:ebi-a-GCST003045	TRUE	reported	igd
6.12774e-13	70642923	-0.115389	17	27432	0.0160316	ebi-a-GCST003045	rs17780256	C	A	0.1927	Ulcerative colitis || id:ebi-a-GCST003045	TRUE	reported	igd
2.24233e-13	12887750	0.093806	18	27432	0.0127914	ebi-a-GCST003045	rs8096327	G	A	0.3839	Ulcerative colitis || id:ebi-a-GCST003045	TRUE	reported	igd
2.49862e-10	46395022	-0.0823655	18	27432	0.0130179	ebi-a-GCST003045	rs7240004	G	A	0.3795	Ulcerative colitis || id:ebi-a-GCST003045	TRUE	reported	igd
3.41036e-08	47119910	0.0691316	19	27432	0.0125262	ebi-a-GCST003045	rs11083840	G	T	0.4025	Ulcerative colitis || id:ebi-a-GCST003045	TRUE	reported	igd
1.67225e-11	10469975	0.153279	19	27432	0.0227683	ebi-a-GCST003045	rs12720356	C	A	0.08572	Ulcerative colitis || id:ebi-a-GCST003045	TRUE	reported	igd
6.16737e-12	33731551	0.0958444	19	27432	0.0139396	ebi-a-GCST003045	rs17694108	A	G	0.2797	Ulcerative colitis || id:ebi-a-GCST003045	TRUE	reported	igd
1.87068e-16	43068996	0.103346	20	27432	0.0125571	ebi-a-GCST003045	rs4812833	A	G	0.5188	Ulcerative colitis || id:ebi-a-GCST003045	TRUE	reported	igd
1.33137e-42	1682037	-0.260863	20	27432	0.0190685	ebi-a-GCST003045	rs6111031	T	C	0.1591	Ulcerative colitis || id:ebi-a-GCST003045	TRUE	reported	igd
9.13903e-19	62329099	0.113898	20	27432	0.0128769	ebi-a-GCST003045	rs6062496	A	G	0.5694	Ulcerative colitis || id:ebi-a-GCST003045	TRUE	reported	igd
1.22914e-08	48955424	-0.0757579	20	27432	0.013301	ebi-a-GCST003045	rs913678	C	T	0.3293	Ulcerative colitis || id:ebi-a-GCST003045	TRUE	reported	igd
1.47333e-53	40466744	-0.227134	21	27432	0.0147424	ebi-a-GCST003045	rs2836883	A	G	0.2728	Ulcerative colitis || id:ebi-a-GCST003045	TRUE	reported	igd
2.09604e-15	16805676	-0.10106	21	27432	0.0127351	ebi-a-GCST003045	rs1297256	T	C	0.4249	Ulcerative colitis || id:ebi-a-GCST003045	TRUE	reported	igd
7.06968e-16	45616324	-0.102758	21	27432	0.0127344	ebi-a-GCST003045	rs4456788	A	G	0.6106	Ulcerative colitis || id:ebi-a-GCST003045	TRUE	reported	igd
3.84326e-15	39662480	-0.142696	22	27432	0.0181548	ebi-a-GCST003045	rs9611131	C	T	0.1477	Ulcerative colitis || id:ebi-a-GCST003045	TRUE	reported	igd
1.18631e-19	30173109	-0.129716	22	27432	0.0143011	ebi-a-GCST003045	rs140143	T	G	0.3897	Ulcerative colitis || id:ebi-a-GCST003045	TRUE	reported	igd
