# Supplementary material for: Exploring the causal relationship between inflammatory bowel disease and sarcopenia-related traits: a two-sample Mendelian randomization analysis
Source: Aging (Albany NY). 2023 Dec 31;16(1):799–819. doi: 10.18632/aging.205421 (PMC10817405; doi:10.18632/aging.205421)
Supplement: Supplementary Table 3 [file aging-16-205421-s004.xlsx]

## Sheet: Sheet1
Supplementary Table 3. The detailed information on the IVs for CD.
chr.exposure	se.exposure	pos.exposure	samplesize.exposure	pval.exposure	beta.exposure	id.exposure	SNP	effect_allele.exposure	other_allele.exposure	eaf.exposure	exposure	mr_keep.exposure	pval_origin.exposure	data_source.exposure
1	0.0450901	67862986	51874	2.81365e-10	-0.284461	ieu-a-12	rs17129991	T	C	0.02246	Crohn's disease || id:ieu-a-12	TRUE	reported	igd
1	0.0199954	78623626	51874	2.61818e-09	-0.119051	ieu-a-12	rs17391694	T	C	0.1226	Crohn's disease || id:ieu-a-12	TRUE	reported	igd
1	0.0121937	155181843	51874	5.79522e-10	0.0755507	ieu-a-12	rs2974935	T	G	0.4948	Crohn's disease || id:ieu-a-12	TRUE	reported	igd
1	0.0126389	161472158	51874	8.47813e-13	-0.0904086	ieu-a-12	rs10800309	G	A	0.6578	Crohn's disease || id:ieu-a-12	TRUE	reported	igd
1	0.0119822	186875459	51874	4.24717e-09	-0.070387	ieu-a-12	rs10798069	T	G	0.4925	Crohn's disease || id:ieu-a-12	TRUE	reported	igd
1	0.0220556	114303808	51874	4.66659e-17	-0.185152	ieu-a-12	rs6679677	A	C	0.09755	Crohn's disease || id:ieu-a-12	TRUE	reported	igd
1	0.0198422	120437884	51874	9.65162e-10	-0.121336	ieu-a-12	rs2641348	G	A	0.1077	Crohn's disease || id:ieu-a-12	TRUE	reported	igd
1	0.0137443	172866210	51874	1.42758e-22	0.134364	ieu-a-12	rs12411259	A	G	0.2401	Crohn's disease || id:ieu-a-12	TRUE	reported	igd
1	0.0159634	206939904	51874	3.94548e-25	0.165311	ieu-a-12	rs3024505	A	G	0.1573	Crohn's disease || id:ieu-a-12	TRUE	reported	igd
1	0.0141395	197559324	51874	6.52529e-15	0.110194	ieu-a-12	rs6702421	T	C	0.2255	Crohn's disease || id:ieu-a-12	TRUE	reported	igd
1	0.0124758	67681669	51874	1.37721e-159	-0.335814	ieu-a-12	rs7517847	G	T	0.4352	Crohn's disease || id:ieu-a-12	TRUE	reported	igd
1	0.0138184	200874229	51874	7.8361e-28	-0.151105	ieu-a-12	rs35730213	C	G	0.2807	Crohn's disease || id:ieu-a-12	TRUE	reported	igd
1	0.0170379	8051241	51874	1.60313e-10	-0.108961	ieu-a-12	rs36016881	G	A	0.1754	Crohn's disease || id:ieu-a-12	TRUE	reported	igd
2	0.0222451	43777964	51874	2.1923e-16	0.182656	ieu-a-12	rs77981966	T	C	0.07271	Crohn's disease || id:ieu-a-12	TRUE	reported	igd
2	0.0125708	102939036	51874	1.67687e-22	-0.122687	ieu-a-12	rs13001325	T	C	0.3757	Crohn's disease || id:ieu-a-12	TRUE	reported	igd
2	0.0233162	145481827	51874	1.35176e-11	-0.157687	ieu-a-12	rs11691685	G	A	0.08024	Crohn's disease || id:ieu-a-12	TRUE	reported	igd
2	0.0124517	191931464	51874	1.31362e-10	0.0800097	ieu-a-12	rs1517352	C	A	0.6048	Crohn's disease || id:ieu-a-12	TRUE	reported	igd
2	0.011991	219110625	51874	8.97635e-11	0.0777406	ieu-a-12	rs6738394	A	G	0.4519	Crohn's disease || id:ieu-a-12	TRUE	reported	igd
2	0.0136242	231148128	51874	2.50092e-17	0.115366	ieu-a-12	rs12694846	G	A	0.2593	Crohn's disease || id:ieu-a-12	TRUE	reported	igd
2	0.0121405	61204856	51874	2.94917e-23	0.120609	ieu-a-12	rs7608910	G	A	0.3909	Crohn's disease || id:ieu-a-12	TRUE	reported	igd
2	0.0120892	234161583	51874	4.25794e-78	0.226164	ieu-a-12	rs6738490	C	T	0.5274	Crohn's disease || id:ieu-a-12	TRUE	reported	igd
2	0.0119519	25097644	51874	9.63607e-22	0.114508	ieu-a-12	rs13407913	G	A	0.4306	Crohn's disease || id:ieu-a-12	TRUE	reported	igd
2	0.0120611	27741237	51874	4.55722e-22	-0.116483	ieu-a-12	rs780094	C	T	0.6051	Crohn's disease || id:ieu-a-12	TRUE	reported	igd
2	0.0137546	242737341	51874	9.89464e-10	0.0840555	ieu-a-12	rs35320439	C	T	0.3104	Crohn's disease || id:ieu-a-12	TRUE	reported	igd
2	0.0141387	65667272	51874	1.7362e-12	0.099737	ieu-a-12	rs6740462	A	C	0.7378	Crohn's disease || id:ieu-a-12	TRUE	reported	igd
3	0.0171654	18765978	51874	1.08868e-14	0.132662	ieu-a-12	rs11713774	C	T	0.1427	Crohn's disease || id:ieu-a-12	TRUE	reported	igd
3	0.0128775	49721532	51874	2.05211e-33	0.155114	ieu-a-12	rs3197999	A	G	0.2812	Crohn's disease || id:ieu-a-12	TRUE	reported	igd
4	0.0126601	48363245	51874	3.41979e-11	0.0839019	ieu-a-12	rs7438704	G	A	0.6435	Crohn's disease || id:ieu-a-12	TRUE	reported	igd
4	0.0249741	102926923	51874	1.41059e-15	0.199406	ieu-a-12	rs34592089	A	G	0.05297	Crohn's disease || id:ieu-a-12	TRUE	reported	igd
4	0.0125632	123184411	51874	3.27002e-10	-0.0789645	ieu-a-12	rs6827756	C	T	0.6251	Crohn's disease || id:ieu-a-12	TRUE	reported	igd
5	0.0125984	96252803	51874	3.89135e-16	0.102575	ieu-a-12	rs1363907	A	G	0.4212	Crohn's disease || id:ieu-a-12	TRUE	reported	igd
5	0.012297	10689562	51874	5.04313e-13	0.0888353	ieu-a-12	rs3776414	G	T	0.3756	Crohn's disease || id:ieu-a-12	TRUE	reported	igd
5	0.0124713	40414886	51874	5.16535e-88	0.24803	ieu-a-12	rs7711427	C	A	0.613	Crohn's disease || id:ieu-a-12	TRUE	reported	igd
5	0.0182147	40521892	51874	1.69551e-13	-0.134258	ieu-a-12	rs79980175	C	A	0.136	Crohn's disease || id:ieu-a-12	TRUE	reported	igd
5	0.0149485	55440730	51874	6.574e-10	-0.0923221	ieu-a-12	rs71624119	A	G	0.2422	Crohn's disease || id:ieu-a-12	TRUE	reported	igd
5	0.0198222	150258920	51874	3.21144e-45	0.279727	ieu-a-12	rs11167518	A	C	0.08143	Crohn's disease || id:ieu-a-12	TRUE	reported	igd
5	0.0132248	71693899	51874	3.03054e-08	-0.073261	ieu-a-12	rs4703855	T	C	0.2998	Crohn's disease || id:ieu-a-12	TRUE	reported	igd
5	0.0120781	131778452	51874	7.17133e-56	0.190197	ieu-a-12	rs17622378	G	A	0.4186	Crohn's disease || id:ieu-a-12	TRUE	reported	igd
5	0.0126747	72539850	51874	1.27145e-13	-0.0939086	ieu-a-12	rs34804116	A	C	0.3867	Crohn's disease || id:ieu-a-12	TRUE	reported	igd
5	0.0127047	141526057	51874	4.53419e-15	0.0995948	ieu-a-12	rs181826	A	C	0.6266	Crohn's disease || id:ieu-a-12	TRUE	reported	igd
5	0.0172142	158824174	51874	6.53582e-20	-0.157253	ieu-a-12	rs17388425	G	C	0.1598	Crohn's disease || id:ieu-a-12	TRUE	reported	igd
5	0.0134853	173373948	51874	9.3994e-12	-0.091908	ieu-a-12	rs56163845	G	A	0.3096	Crohn's disease || id:ieu-a-12	TRUE	reported	igd
6	0.0128298	31274380	51874	6.77798e-32	0.150794	ieu-a-12	rs9264942	C	T	0.3529	Crohn's disease || id:ieu-a-12	TRUE	reported	igd
6	0.0142376	137983469	51874	4.18071e-10	-0.088944	ieu-a-12	rs9494844	A	C	0.2519	Crohn's disease || id:ieu-a-12	TRUE	reported	igd
6	0.012909	382559	51874	1.06106e-09	0.078744	ieu-a-12	rs7773324	A	G	0.6002	Crohn's disease || id:ieu-a-12	TRUE	reported	igd
6	0.0132299	90973159	51874	1.08971e-10	-0.0853854	ieu-a-12	rs1847472	A	C	0.3421	Crohn's disease || id:ieu-a-12	TRUE	reported	igd
6	0.0124045	167392174	51874	2.07922e-23	0.123663	ieu-a-12	rs9457247	T	C	0.5398	Crohn's disease || id:ieu-a-12	TRUE	reported	igd
6	0.0150464	20728731	51874	4.80839e-12	0.103988	ieu-a-12	rs6908425	C	T	0.7843	Crohn's disease || id:ieu-a-12	TRUE	reported	igd
6	0.0119962	21438889	51874	1.3671e-16	-0.0991795	ieu-a-12	rs6456426	A	C	0.4984	Crohn's disease || id:ieu-a-12	TRUE	reported	igd
6	0.0128549	106449085	51874	2.17921e-25	0.133849	ieu-a-12	rs11152949	G	A	0.3195	Crohn's disease || id:ieu-a-12	TRUE	reported	igd
6	0.0172814	32186245	51874	3.41507e-20	0.159076	ieu-a-12	rs438475	A	G	0.1322	Crohn's disease || id:ieu-a-12	TRUE	reported	igd
6	0.0151984	14715257	51874	9.69059e-09	0.0871787	ieu-a-12	rs1267501	C	T	0.8106	Crohn's disease || id:ieu-a-12	TRUE	reported	igd
6	0.0130803	32406342	51874	1.79556e-11	-0.087922	ieu-a-12	rs3129871	C	A	0.6601	Crohn's disease || id:ieu-a-12	TRUE	reported	igd
6	0.0163762	128280358	51874	3.80102e-17	0.137869	ieu-a-12	rs9491892	G	T	0.1496	Crohn's disease || id:ieu-a-12	TRUE	reported	igd
6	0.0124319	159490436	51874	1.79515e-16	-0.102377	ieu-a-12	rs212388	T	C	0.6043	Crohn's disease || id:ieu-a-12	TRUE	reported	igd
7	0.01402	26892531	51874	6.63285e-14	0.105079	ieu-a-12	rs3801810	A	G	0.2337	Crohn's disease || id:ieu-a-12	TRUE	reported	igd
7	0.0131392	50304461	51874	1.03467e-13	0.0977081	ieu-a-12	rs1456896	T	C	0.6894	Crohn's disease || id:ieu-a-12	TRUE	reported	igd
7	0.0208449	50533716	51874	1.83443e-27	0.226326	ieu-a-12	rs11768997	T	G	0.1346	Crohn's disease || id:ieu-a-12	TRUE	reported	igd
7	0.0281553	98750379	51874	3.1348e-10	-0.177152	ieu-a-12	rs2395022	C	A	0.95885	Crohn's disease || id:ieu-a-12	TRUE	reported	igd
7	0.0122847	148220448	51874	1.04597e-09	-0.0749643	ieu-a-12	rs2538470	G	A	0.6378	Crohn's disease || id:ieu-a-12	TRUE	reported	igd
7	0.0183382	28154384	51874	9.83354e-10	0.112085	ieu-a-12	rs7786444	T	C	0.1163	Crohn's disease || id:ieu-a-12	TRUE	reported	igd
8	0.0137523	90875918	51874	8.99974e-10	-0.0842498	ieu-a-12	rs7015630	C	T	0.2657	Crohn's disease || id:ieu-a-12	TRUE	reported	igd
8	0.0183017	129567181	51874	3.86011e-16	-0.149029	ieu-a-12	rs6651252	C	T	0.13	Crohn's disease || id:ieu-a-12	TRUE	reported	igd
8	0.0123641	126536137	51874	8.34065e-22	0.118641	ieu-a-12	rs10956252	G	C	0.6189	Crohn's disease || id:ieu-a-12	TRUE	reported	igd
9	0.0129961	117569046	51874	1.54846e-27	0.141308	ieu-a-12	rs7848647	C	T	0.6746	Crohn's disease || id:ieu-a-12	TRUE	reported	igd
9	0.012299	4981602	51874	4.18504e-34	-0.14975	ieu-a-12	rs10758669	A	C	0.6504	Crohn's disease || id:ieu-a-12	TRUE	reported	igd
9	0.0121801	139271850	51874	9.80393e-44	0.168922	ieu-a-12	rs11793497	G	A	0.423	Crohn's disease || id:ieu-a-12	TRUE	reported	igd
10	0.0123872	35466185	51874	1.89714e-27	0.134457	ieu-a-12	rs34779708	G	T	0.3512	Crohn's disease || id:ieu-a-12	TRUE	reported	igd
10	0.0134477	81042475	51874	5.85733e-26	-0.141693	ieu-a-12	rs1250573	A	G	0.3155	Crohn's disease || id:ieu-a-12	TRUE	reported	igd
10	0.0120372	101288347	51874	1.52651e-47	-0.174348	ieu-a-12	rs7085798	A	C	0.5176	Crohn's disease || id:ieu-a-12	TRUE	reported	igd
10	0.0203346	6094697	51874	3.19227e-13	0.148159	ieu-a-12	rs61839660	T	C	0.08983	Crohn's disease || id:ieu-a-12	TRUE	reported	igd
10	0.0124275	30708441	51874	8.37568e-10	0.0762756	ieu-a-12	rs303429	T	C	0.5997	Crohn's disease || id:ieu-a-12	TRUE	reported	igd
10	0.0168972	82305627	51874	1.05412e-10	-0.109139	ieu-a-12	rs11185982	C	T	0.1517	Crohn's disease || id:ieu-a-12	TRUE	reported	igd
10	0.0155227	59972299	51874	2.39497e-12	-0.108804	ieu-a-12	rs2153283	A	C	0.217	Crohn's disease || id:ieu-a-12	TRUE	reported	igd
10	0.012242	64438486	51874	4.92266e-53	-0.187653	ieu-a-12	rs10995271	C	G	0.6098	Crohn's disease || id:ieu-a-12	TRUE	reported	igd
10	0.0137489	75669190	51874	4.72389e-13	0.0994456	ieu-a-12	rs2227551	T	G	0.7288	Crohn's disease || id:ieu-a-12	TRUE	reported	igd
11	0.0526931	3059360	51874	4.95564e-51	-0.79177	ieu-a-12	rs12796489	A	C	0.02286	Crohn's disease || id:ieu-a-12	TRUE	reported	igd
11	0.0158237	64150370	51874	3.74524e-10	0.099124	ieu-a-12	rs559928	C	T	0.8128	Crohn's disease || id:ieu-a-12	TRUE	reported	igd
11	0.0120572	76299649	51874	8.53886e-51	0.180737	ieu-a-12	rs11236797	A	C	0.4444	Crohn's disease || id:ieu-a-12	TRUE	reported	igd
11	0.0183059	60799046	51874	2.85496e-16	-0.14973	ieu-a-12	rs34787213	T	C	0.1401	Crohn's disease || id:ieu-a-12	TRUE	reported	igd
12	0.0119969	111884608	51874	1.71017e-08	-0.067651	ieu-a-12	rs3184504	C	T	0.5074	Crohn's disease || id:ieu-a-12	TRUE	reported	igd
12	0.011991	68579649	51874	1.03612e-09	-0.0731898	ieu-a-12	rs7969592	G	A	0.4746	Crohn's disease || id:ieu-a-12	TRUE	reported	igd
12	0.023765	40669826	51874	4.20436e-11	0.15677	ieu-a-12	rs10878302	A	T	0.92855	Crohn's disease || id:ieu-a-12	TRUE	reported	igd
12	0.0126539	6493100	51874	1.2933e-11	0.0856594	ieu-a-12	rs28999107	T	G	0.4387	Crohn's disease || id:ieu-a-12	TRUE	reported	igd
12	0.0370279	40607709	51874	1.74703e-26	0.394341	ieu-a-12	rs76906269	G	A	0.01883	Crohn's disease || id:ieu-a-12	TRUE	reported	igd
13	0.0146501	100040654	51874	8.28896e-11	-0.0951561	ieu-a-12	rs9554587	G	A	0.2242	Crohn's disease || id:ieu-a-12	TRUE	reported	igd
13	0.0121434	43040043	51874	1.38526e-09	-0.0735547	ieu-a-12	rs9594766	A	G	0.5294	Crohn's disease || id:ieu-a-12	TRUE	reported	igd
13	0.0121244	27558881	51874	2.42493e-13	0.0887872	ieu-a-12	rs1927681	A	T	0.443	Crohn's disease || id:ieu-a-12	TRUE	reported	igd
13	0.0119709	40695992	51874	2.5875e-08	0.066645	ieu-a-12	rs915286	A	G	0.5488	Crohn's disease || id:ieu-a-12	TRUE	reported	igd
13	0.0142318	44484706	51874	4.6752e-25	0.147148	ieu-a-12	rs6561151	A	G	0.2235	Crohn's disease || id:ieu-a-12	TRUE	reported	igd
14	0.0207601	88476004	51874	7.59277e-14	0.155227	ieu-a-12	rs11159833	T	C	0.08681	Crohn's disease || id:ieu-a-12	TRUE	reported	igd
14	0.0167191	75741751	51874	6.47441e-11	-0.109215	ieu-a-12	rs1569328	T	C	0.1702	Crohn's disease || id:ieu-a-12	TRUE	reported	igd
15	0.0149661	38847022	51874	5.28202e-12	0.103233	ieu-a-12	rs72727394	T	C	0.2007	Crohn's disease || id:ieu-a-12	TRUE	reported	igd
15	0.0139602	67442596	51874	3.69828e-20	0.128384	ieu-a-12	rs17293632	T	C	0.2364	Crohn's disease || id:ieu-a-12	TRUE	reported	igd
16	0.0146056	50508101	51874	2.17721e-23	0.145539	ieu-a-12	rs6500315	G	A	0.7753	Crohn's disease || id:ieu-a-12	TRUE	reported	igd
16	0.013383	11359680	51874	8.61787e-17	-0.111379	ieu-a-12	rs1646019	T	C	0.303	Crohn's disease || id:ieu-a-12	TRUE	reported	igd
16	0.0144786	50846832	51874	8.92689e-18	0.124328	ieu-a-12	rs2270395	T	C	0.7616	Crohn's disease || id:ieu-a-12	TRUE	reported	igd
16	0.0164404	86015316	51874	1.09094e-19	-0.14927	ieu-a-12	rs11117431	G	A	0.1978	Crohn's disease || id:ieu-a-12	TRUE	reported	igd
16	0.0121749	50725193	51874	1.4184e-77	-0.226986	ieu-a-12	rs7194886	T	C	0.4357	Crohn's disease || id:ieu-a-12	TRUE	reported	igd
16	0.0122466	28517709	51874	1.2933e-22	0.119845	ieu-a-12	rs26528	C	T	0.4576	Crohn's disease || id:ieu-a-12	TRUE	reported	igd
17	0.0137815	32570547	51874	2.95665e-25	-0.143097	ieu-a-12	rs9889296	A	G	0.2723	Crohn's disease || id:ieu-a-12	TRUE	reported	igd
17	0.0120311	38023745	51874	3.83619e-28	0.132338	ieu-a-12	rs4795397	G	A	0.4713	Crohn's disease || id:ieu-a-12	TRUE	reported	igd
17	0.0123587	40526273	51874	3.47376e-17	-0.104177	ieu-a-12	rs12949918	C	T	0.4185	Crohn's disease || id:ieu-a-12	TRUE	reported	igd
17	0.0118917	57963537	51874	1.74703e-14	0.0911854	ieu-a-12	rs1292053	G	A	0.442	Crohn's disease || id:ieu-a-12	TRUE	reported	igd
17	0.0126283	54880993	51874	1.17319e-10	0.0813612	ieu-a-12	rs3853824	C	T	0.6385	Crohn's disease || id:ieu-a-12	TRUE	reported	igd
18	0.0158476	12782448	51874	6.13762e-26	-0.166911	ieu-a-12	rs2847293	T	A	0.8404	Crohn's disease || id:ieu-a-12	TRUE	reported	igd
18	0.017342	77220616	51874	9.09452e-09	-0.0996611	ieu-a-12	rs7236492	T	C	0.1537	Crohn's disease || id:ieu-a-12	TRUE	reported	igd
19	0.015563	10525181	51874	3.18787e-20	-0.143373	ieu-a-12	rs35164067	A	G	0.2039	Crohn's disease || id:ieu-a-12	TRUE	reported	igd
19	0.0134523	33731551	51874	3.29018e-09	0.0795895	ieu-a-12	rs17694108	A	G	0.2797	Crohn's disease || id:ieu-a-12	TRUE	reported	igd
19	0.0124963	34670725	51874	1.30704e-09	-0.0758092	ieu-a-12	rs640466	C	T	0.3739	Crohn's disease || id:ieu-a-12	TRUE	reported	igd
19	0.0143378	1124031	51874	7.12525e-25	0.147664	ieu-a-12	rs2024092	A	G	0.2162	Crohn's disease || id:ieu-a-12	TRUE	reported	igd
19	0.0123121	49206172	51874	1.3277e-20	0.114576	ieu-a-12	rs516246	T	C	0.4652	Crohn's disease || id:ieu-a-12	TRUE	reported	igd
20	0.018121	1682037	51874	9.60727e-55	-0.282366	ieu-a-12	rs6111031	T	C	0.1591	Crohn's disease || id:ieu-a-12	TRUE	reported	igd
20	0.0137745	44740196	51874	2.6965e-12	-0.0963211	ieu-a-12	rs6074022	T	C	0.7497	Crohn's disease || id:ieu-a-12	TRUE	reported	igd
20	0.0119064	57824309	51874	2.08238e-09	-0.0713342	ieu-a-12	rs259964	G	A	0.5414	Crohn's disease || id:ieu-a-12	TRUE	reported	igd
20	0.0124099	62329099	51874	3.81593e-22	0.120078	ieu-a-12	rs6062496	A	G	0.5694	Crohn's disease || id:ieu-a-12	TRUE	reported	igd
21	0.0122169	16806709	51874	2.10523e-25	-0.127246	ieu-a-12	rs1297258	T	C	0.4249	Crohn's disease || id:ieu-a-12	TRUE	reported	igd
21	0.0123247	34776695	51874	5.626e-17	0.103192	ieu-a-12	rs2284553	G	A	0.5904	Crohn's disease || id:ieu-a-12	TRUE	reported	igd
21	0.0121887	45614860	51874	4.4761e-24	-0.123357	ieu-a-12	rs8127691	C	T	0.6132	Crohn's disease || id:ieu-a-12	TRUE	reported	igd
22	0.0168361	39659773	51874	7.72147e-36	-0.210407	ieu-a-12	rs2413583	T	C	0.1654	Crohn's disease || id:ieu-a-12	TRUE	reported	igd
22	0.013562	30173109	51874	7.94511e-21	-0.126945	ieu-a-12	rs140143	T	G	0.3897	Crohn's disease || id:ieu-a-12	TRUE	reported	igd
22	0.014461	41867377	51874	1.88274e-10	-0.0921252	ieu-a-12	rs727563	T	C	0.7973	Crohn's disease || id:ieu-a-12	TRUE	reported	igd
